# Supplementary material for: Managerial Beliefs and Banking Behavior
Source: Springer Nature journal article supplement (doi:10.1007/s10693-023-00407-5), 2023-04-05
Supplement: MOESM1 [file 25213600]

**Online appendix available at:**

<https://www.unical.it/portale/strutture/dipartimenti_240/disesf/servizi/silipo/ricerca/Online%20Appendix.pdf>

| **Table A4** Summary of the estimation of equation 1 without the VIX among the regressors  The dependent variable is the change in ln(Loss allowance/loans) (△ALLOWANCES). Panel a displays the results with annual percentage GDP growth *at national level (National GDP_GROWTH)* as a regressor. Panel b shows the results with annual percentage GDP growth *at state level (State GDP_GROWTH* ) as a regressor. The charge-offs are expressed in levels not in changes. The pooled OLS comprises the heteroskedastic- and autocorrelation-consistent (HAC) standard errors and covariance (Bartlett kernel, Newey-West fixed bandwidth = 26.0000). Standard errors of the coefficients are in the brackets. All coefficients are significant at a 1% probability level, apart from those denoted by ^ (not significant even at a 10% probability level). The equals the sum of the coefficients; the corresponding significance is obtained with a Wald test. Quarterly data ranges from the second quarter of 2003 to the fourth quarter of 2019. Dummies capture respectively the first, second and third quarter of the year seasonal effects.  Coefficients and standard errors are multiplied by 100. | | | | | | | |
| --- | --- | --- | --- | --- | --- | --- | --- |
| **Panel a** Results with National *GDP_GROWTH* among regressors | | | | | | | |
|  | **Constant** | **Trend** | **Dummy3** | **Dummy6** | **Dummy9** |  |  |
|  | 1134.47(0.076) | 0.593(0.050) | 0.877(0.048) | 0.358(0.035) | -1.270(0.032) |  |  |
|  | **ALLOWANCES(-1)** | **Ln(LOANS/T_ASSETS)** | **lnT_ASSETS** | **lnTIER_1** | **CHARGE-OFFS** | **NONPERFORMING** | **Ln (RWA/T_ASSETS)** |
| Level(t-1) | -1.270(0.032) | -0.722(0.064) | -0.113(0.019) | -0.632(0.042) | **-** | 0.129(0.011) | 1.475(0.086) |
| Change(t) | **-** | -85.80(0.277) | -84.17(0.300) | -3.685(0.194) | -14.88(0.088) | 1.248(0.023) | 0.777(0.221) |
| hange(t-j) | 15.365(0.370) | 36.854(0.852) | 46.756(0.605) | 5.830(0.591) | 10.853(0.075) | 1.345(0.067) | 0.768(1.003)^ |
|  | **ROA** | **RANK_OP/**  **1000** | **National *GDP_***  ***GROWTH*** | **FED_FUND** | **lnS&P_INDEX** | **EXP_GDP-GROWTH** |  |
| Level(t-1) | 1.132(0.037) | -0.004(0.001) | -0.933(0.055) | -0.157(0.037) | 4.414(0.520) | -1.766(0.341) |  |
| Change(t) | -0.457(0.029) | **-** | 0.190(0.038) | 0.230(0.043) | -3.663(0.324) | -0.820(0.067) |  |
| Change(t-j) | 0.556(0.132) | **-**0.007(0.01)^ | 3.840(2.203) | 0.199(0.207)^ | -4.867(1.396) | 0.053(1.172)^ |  |
| Adjusted R-squared | | 0.508 |  | Durbin-Watson stat | | 1.749 |  |
| S.E. of regression | | 4.956 |  | Included observations | | 395,321 |  |
| **Panel b** Results with State *GDP_GROWTH among regressors* | | | | | | | |
|  | **Constant** | **Trend** | **Dummy3** | **Dummy6** | **Dummy9** |  |  |
|  | -638(98.7) | 0.326(0.050) | 0.628(0.055) | 0.860(0.049) | 0.278(0.037) |  |  |
|  | **ALLOWANCES(-1)** | **Ln(LOANS/**  **T_ASSETS)** | **lnT_ASSETS** | **lnTIER_1** | **CHARGE-OFFS** | **NONPERFORMING** | **Ln (RWA/T_ASSETS)** |
| Level(t-1) | -1.280(0.036) | -0.715(0.072) | -0.078(0.023) | -0.742(0.049) | **-** | 0.131(0.012) | 1.375(0.097) |
| Change(t) | **-** | -86.11(0.317) | -86.21(0.329) | -4.53(0.241) | -14.60(0.098) | 1.282(0.026) | 0.217(0.247) |
| hange(t-j) | 16.292(0.386) | 36.853(0.852) | 46.756(0.605) | 5.829(0.590) | 10.85(0.074) | 1.344(0.067) | 0.767(1.002) |
|  | **ROA** | **RANK_OP/**  **1000** | ***State GDP_***  ***GROWTH*** | **FED_FUND** | **lnS&P_INDEX** | **EXP_GDP-GROWTH** |  |
| Level(t-1) | 1.178(0.043) | -0.005(0.001) | -0.018(0.005) | 0.183(0.026) | -2.993(0.030) | -0.415(0.278) |  |
| Change(t) | -0.467(0.033) | **-** | -0.036(0.007) | 0.302(0.048) | -4.176(0.263) | -0.505(0.075) |  |
| Change(t-j) | 0.555(0.131) | 0.007(0.007)^ | **-** | -2.301(0.90)^ | 3.176(0.737) | -2.64(0.280)^ |  |
|  | |  |  |  | |  |  |
| Adjusted R-squared | | 0.507 |  | Durbin-Watson stat | | 1.749 |  |
| S.E. of regression | | 5.009 |  | Included observations | | 302.915 |  |

|  |
| --- |
| **Table A5** Correlations of the residuals for different estimators of equation 1  This table displays the correlations from using a least squares, quantile regressions, least squares with fixed effects, and a GMM with fixed effects as estimators. | | | | |
|  | Residuals of least squares estimates | Residuals of quantile regression estimates | Residuals of least squares estimates with fixed effects | Residuals of GMM with fixed effects |
| Residuals of least squares estimates | 1.0000 | 0.9907 | 0.9972 | 0.9499 |
| Residuals of quantile regression estimates | 0.9907 | 1.0000 | 0.9966 | 0.9571 |
| Residuals of least squares estimates with fixed effects | 0.9972 | 0.9966 | 1.0000 | 0.9576 |
| Residuals of GMM with fixed effects | 0.9499 | 0.9571 | 0.9576 | 1.0000 |

| **Table A6** Fitness of the data with alternative measures of real GDP growth as a regressor in equation 1  Panel a displays a comparison of the results with the real GDP growths of single states and the US as regressors with standard errors in the brackets. Panel b displays the levels of significance of the coefficients of real GDP Growth at the state level with standard errors in the brackets. The sample period for both panels a and b is quarter 2 of 2008 to quarter 4 of 2019.  Panel cshows the comparison of the results with real GDP growth of single states and US GDP growth as regressors. The sample period in the panel is quarter 2 of 2006 to quarter 4 of 2019. | | | | | |
| --- | --- | --- | --- | --- | --- |
| **Panel a** | Regressions | | Residual correlations | | |
|  | Adj R2 | Regression SE | National GDP | State GDP | Both |
| National GDP | 0.517585 | 4.994938 | 1 | 0.999252 | 0.999324 |
| State GDP | 0.517026 | 4.997830 | 0.999252 | 1 | 0.999903 |
| Both | 0.517659 | 4.994552 | 0.999324 | 0.999903 | 1 |
| **Panel b** | | | | | |

| StateGDP | Δ(StateGDP) | | | | | | | | |
| --- | --- | --- | --- | --- | --- | --- | --- | --- | --- |
| t-1 | t | t-1 | t-2 | t-3 | t-4 | t-5 | t-6 | t-7 | t-8 |
| -0.0297*** | -0.0302*** | -0.0029 | -0.0010 | 0.0161 | 0.0113 | -0.0147* | -0.0052 | -0.0019 | -0.0146* |
| (0.0086) | (0.0097) | (0.0100) | (0.0098) | (0.0101) | (0.0104) | (0.0077) | (0.0080) | (0.0082) | (0.0083) |
| **Panel c** | | | | | | | | | |

|  | Regressions | | Residual correlations | | |
| --- | --- | --- | --- | --- | --- |
|  | Adj R2 | Regression SE | National GDP | State GDP | Both |
| National GDP | 0.506538 | 5.006892 | 1 | 0.999395 | 0.999446 |
| State GDP | 0.506037 | 5.009434 | 0.999395 | 1 | 0.999967 |
| Both | 0.506568 | 5.006742 | 0.999446 | 0.999967 | 1 |

| **Table A7** Summary of the estimation of equation 1 with the VIX as a regressor  The dependent variable is △ALLOWANCES; the VIX_M equals its average previous quarter value; the VIX_F equals the last day of the previous quarter value of the VIX; and the △VIX equals the absolute changes in the VIX­_M and VIX_F. Dummies capture respectively the first, second and third quarter of the year seasonal effects. -1, -2,…,-8 are the values of the variable one, two,…, eight quarters before. The pooled OLS comprises the heteroskedastic- and autocorrelation-consistent (HAC) standard errors and covariance (Bartlett kernel, Newey-West fixed bandwidth = 26.0000). Standard deviations of the coefficients are in the brackets. All coefficients are significant at a 1% probability level, apart from those indicated by ^ (not significant even at a 10% probability level). Quarterly data ranges from quarter 2 of 2003 to quarter 4 of 2019. The observations total 395,321. The coefficients and standard errors are multiplied by 100. | | | |
| --- | --- | --- | --- |
| **Constant** | 1041.41  **(**181.81) | **Constant** | 730.70  (218.69) |
| Trend | -0.536  **(**0.092) | Trend | -0.379  (0.111) |
| Dummy3 | 0.723  **(**0.061) | Dummy3 | 0.638  (0.053) |
| Dummy6 | 1.175  **(**0.060) | Dummy6 | 0.828  (0.050) |
| Dummy9 | 0.583  **(**0.041) | Dummy9 | 0.481  (0.040) |
| ALLOWANCES (-1) | -1.269  (0.032) | ALLOWANCES (-1) | -1.269  (0.032) |
| VIX_M(-1) | 0.039  **(**0.012) | VIX_F(-1) | -0.049  (0.012) |
| △VIX_M | 0.022  **(**0.006) | △VIX_F | -0.034  (0.004) |
| △VIX_M(-1) | -0.024  **(**0.009) | △VIX_F(-1) | 0.041  (0.009) |
| △VIX_M(-2) | -0.043  **(**0.007) | △VIX_F(-2) | 0.018  (0.008) |
| △VIX_M(-3) | -0.048  **(**0.006) | △VIX_F(-3) | 0.013  (0.006) |
| △VIX_M(-4) | 0.012  **(**0.006) | △VIX_F(-4) | 0.005^  (0.005) |
| △VIX_M(-5) | -0.016  **(**0.006) | △VIX_F(-5) | 0.030  (0.005) |
| △VIX_M(-6) | -0.036  **(**0.005) | △VIX_F(-6) | 0.011  (0.005) |
| △VIX_M(-7) | -0.030  (0.004) | △VIX_F(-7) | 0.015  (0.004) |
| △VIX_M(-8) | 0.006^  (0.004) | △VIX_F(-8) | -0.002^  (0.003) |
| ….  …. |  | ….  …. |  |
| | Adjusted R-squared |  | | --- | --- | | 0.508 | 0.508 |  |
| Adjusted R-squared of estimated equation 1 without the VIX: 0.508 | | | |

| **Table A8** Correlation of the residuals for estimates of equation 1 with and without the VIX  For no VIX, the residuals are obtained by estimating equation 1 without the VIX as a regressor.  VIX_M equals the residuals that are obtained by adding the average previous quarter value of the VIX  as a regressor. VIX_F equals the residuals that are obtained by adding the last day of the previous  quarter VIX as a regressor. | | | |
| --- | --- | --- | --- |
|  | No VIX | VIX_M | VIX_F |
| No VIX | 1.000000 | 0.999778 | 0.999786 |
| VIX_M | 0.999778 | 1.000000 | 0.999725 |
| VIX_F | 0.999786 | 0.999725 | 1.000000 |

| **Table A9** The effects oftheVIX on the residuals obtained by estimating equation 1 without the VIX  The dependent variable is the residuals that are obtained by estimating equation 1 without the VIX; the VIX_M equals the average previous quarter value of the VIX; the VIX_F equals the value of the VIX on the last day of the previous quarter; and the △VIX equals the absolute changes in the VIX_M and the VIX_F. Dummies capture respectively the first, second and third quarter of the year seasonal effects. -1, -2,…,-8 are the values of the variable one, two,…, eight quarters before. The pooled OLS comprises the heteroskedastic- and autocorrelation-consistent (HAC) standard errors and covariance (Bartlett kernel, Newey-West fixed bandwidth = 26.0000). Standard deviations of the coefficients are in the brackets. All coefficients are significant at a 1% probability level, apart from those indicated by ^ (not significant even at a 10% probability level). Quarterly data ranges from quarter 2 of 2003 to quarter 4 of 2019. The observations total 395,321. | | | |
| --- | --- | --- | --- |
| **Constant** | -1.3047^  (3.969) | **Constant** | -1.0314^  (3.928) |
| Trend | 0.0006^  (0.001) | Trend | 0.0005^  (0.001) |
| Dummy3 | 0.0242^  (0.026) | Dummy3 | 0.0531^  (0.027) |
| Dummy6 | 0.0311^  (0.026) | Dummy6 | 0.0291^  (0.028) |
| Dummy9 | 0.0041^  (0.025) | Dummy9 | 0.0709^  (0.028) |
| VIX_M(-1) | 0.0012^  (0.002) | VIX_F(-1) | -0.0009^  (0.002) |
| △VIX_M | 0.0018^  (0.002) | △VIX_F | -0.0070  (0.001) |
| △VIX_M(-1) | -0.0026^  (0.002) | △VIX_F(-1) | 0.0032^  (0.002) |
| △VIX_M(-2) | -0.0012^  (0.002) | △VIX_F(-2) | -0.0020^  (0.002) |
| △VIX_M(-3) | -0.0038^  (0.002) | △VIX_F(-3) | -0.0024^  (0.001) |
| △VIX_M(-4) | 0.0026^  (0.002) | △VIX_F(-4) | -0.0029^  (0.002) |
| △VIX_M(-5) | -0.0012^  (0.001) | △VIX_F(-5) | 0.0046^  (0.001) |
| △VIX_M(-6) | -0.0018^  (0.001) | △VIX_F(-6) | -0.0019^  (0.001) |
| △VIX_M(-7) | -0.0021^  (0.001) | △VIX_F(-7) | 0.0021^  (0.001) |
| △VIX_M(-8) | 0.0022^  (0.001) | △VIX_F(-8) | -0.0017^  (0.001) |
| | Adjusted R-squared |  | | --- | --- | | 0.000013 |  | 0.000087 |

| **Table A10** The effects of the VIX on the residuals obtained by estimating equation 1 without the VIX  The dependent variable is the residuals of equation 1 obtained by estimating equation 1 without the VIX; the △VIX_F equals the absolute change-off on the last day of the previous quarter VIX. The pooled OLS comprises the heteroskedastic- and autocorrelation-consistent (HAC) standard errors and covariance (Bartlett kernel, Newey-West fixed bandwidth = 26.0000). Standard deviations of the coefficients are in the brackets. All coefficients are significant at a 1% probability level, apart from those indicated by ^ (not significant even at a 10% probability level). | | | |
| --- | --- | --- | --- |
| Constant | -0.0008^  (0.010) |  |  |
| △VIX_F | -0.0045  (0.001) |  |  |
| Adjusted R-squared: 0.000031 | | | |

| **Table A11** The effect of managerial optimism and pessimism on future charge-offs.  The dependent variable is the percentage change of net charge-offs to loans h quarters ahead. Dummies capture respectively the first, second and third quarter of the year seasonal effects. is the percentage growth of GDP in state s at quarter t.  Coefficients and standard errors are multiplied by 100. | | | | |
| --- | --- | --- | --- | --- |
| CHARGE_OFFS% | h=1 | h=2 | h=3 | h=4 |
| C | -1.488*** | 4.932*** | 6.948*** | 13.617*** |
|  | (0.473) | (0.837) | (1.060) | (1.196) |
| Dummy3 | 5.281*** | 3.755*** | 4.376*** | -5.903*** |
|  | (0.080) | (0.080) | (0.083) | (0.098) |
| Dummy6 | 6.247*** | 6.696*** | -2.133*** | -2.445*** |
|  | (0.075) | (0.094) | (0.084) | (0.084) |
| Dummy9 | 7.942*** | -1.275*** | -0.314*** | -1.655*** |
|  | (0.082) | (0.074) | (0.066) | (0.069) |
|  | 15.629*** | 27.713*** | 30.370*** | 34.485*** |
|  | (0.361) | (0.537) | (0.595) | (0.649) |
|  | 24.457*** | 37.553*** | 48.935*** | 44.632*** |
|  | (0.491) | (0.753) | (0.912) | (0.903) |
| (-1) | 1.162*** | 1.660*** | 1.398*** | 1.008*** |
|  | (0.050) | (0.088) | (0.111) | (0.124) |
| CHARGE_OFFS% | 72.338*** | 50.596*** | 39.625*** | 36.876*** |
|  | (0.173) | (0.283) | (0.329) | (0.357) |
|  | -0.198***  (0.008) | -0.398***  (0.014) | -0.478***  (0.018) | -0.529***  (0.020) |
| RANK_OP/1000 | -18.341*** | -38.087*** | -49.375*** | -69.035*** |
|  | (1.483) | (2.625) | (3.335) | (3.807) |
| RWA/T_ASSET | 0.0246*** | 0.0535*** | 0.0800*** | 0.104*** |
|  | (0.0018) | (0.0032) | (0.0040) | (0.005) |
| LOG_T_ASSET | 0.321*** | 0.361*** | 0.296*** | -0.135* |
|  | (0.031) | (0.054) | (0.069) | (0.078) |
| Adjusted R-squared | 0.662 | 0.336 | 0.215 | 0.184 |
| Durbin-Watson stat | 1.960 | 1.142 | 0.868 | 0.765 |
| Obs | 242,604 | 245,239 | 244,944 | 244,338 |
| C(5)=c(6) Wald test | Pr = 0.000 | Pr = 0.000 | Pr = 0.000 | Pr = 0.000 |

The ***, **, and * represent significance at the 1%, 5%, and 10% probability levels respectively.

| **Table A12** The effect of managerial optimism and pessimism on future charge-offs with the VIX_M as a regressor  The dependent variable is the percentage change of net charge-offs to loans h quarters ahead. The VIX_M equals the average previous quarter value of the VIX. Dummies capture respectively the first, second and third quarter of the year seasonal effects. is the percentage growth of GDP in state s at quarter t. Coefficients and standard errors are multiplied by 100. | | | | |
| --- | --- | --- | --- | --- |
| CHARGE_OFFS% | h=1 | h=2 | h=3 | h=4 |
| C | -6.795*** | -5.949*** | -7.326*** | -3.280*** |
|  | (0.502) | (0.889) | (1.114) | (1.245) |
| Dummy3 | 5.425*** | 4.105*** | 4.862*** | -5.386*** |
|  | (0.080) | (0.079) | (0.083) | (0.096) |
| Dummy6 | 6.602*** | 7.513*** | -1.113*** | -1.292*** |
|  | (0.076) | (0.096) | (0.085) | (0.086) |
| Dummy9 | 8.224*** | -0.673*** | 0.506*** | -0.745*** |
|  | (0.083) | (0.074) | (0.068) | (0.071) |
|  | 15.217*** | 26.371*** | 28.459*** | 32.251*** |
|  | (0.358) | (0.532) | (0.588) | (0.634) |
|  | 22.046*** | 33.858*** | 44.526*** | 39.218*** |
|  | (0.477) | (0.723) | (0.880) | (0.865) |
| (-1) | 1.335*** | 1.971*** | 1.849*** | 1.521*** |
|  | (0.051) | (0.090) | (0.112) | (0.125) |
| VIX_M | 0.105*** | 0.206*** | 0.269*** | 0.317*** |
|  | (0.003) | (0.005) | (0.006) | (0.007) |
| CHARGE_OFFS % | 71.943*** | 49.405*** | 38.041*** | 35.137*** |
|  | (0.175) | (0.283) | (0.332) | (0.358) |
|  | -0.132*** | -0.269*** | -0.310*** | -0.344*** |
|  | (0.008) | (0.014) | (0.018) | (0.020) |
| RANK_OP/1000 | -5.205*** | -12.39*** | -14.56*** | -27.75*** |
|  | (1.526) | (2.700) | (3.392) | (3.853) |
| RWA/T_ASSET | 0.027*** | 0.057*** | 0.084*** | 0.109*** |
|  | (0.002) | (0.003) | (0.004) | (0.005) |
| LOG_T_ASSET | 0.576*** | 0.896*** | 1.015*** | 0.709*** |
|  | (0.032) | (0.057) | (0.071) | (0.079) |
| Adjusted R-squared | 0.668 | 0.343 | 0.224 | 0.194 |
| Durbin-Watson stat | 1.958 | 1.156 | 0.881 | 0.769 |
| Obs | 242,424 | 245,267 | 245,048 | 24,4461 |
| C(5)=c(6) Wald test | Pr = 0.000 | Pr = 0.000 | Pr = 0.000 | Pr = 0.000 |

The ***, **, and * represent significance at the 1%, 5%, and 10% probability levels respectively.

| **Table A13** The effect of managerial optimism and pessimism on future charge-offs with the VIX_F as a regressor  The dependent variable is the percentage change of net charge-offs to loans h quarters ahead. Dummies capture respectively the first, second and third quarter of the year seasonal effects. is the percentage growth of GDP in state s at quarter t.  The VIX_F equals the value of the VIX on the last day of the previous quarter.  Coefficients and standard errors are multiplied by 100. | | | | |
| --- | --- | --- | --- | --- |
| CHARGE_OFFS% | h=1 | h=2 | h=3 | h=4 |
| C | -7.091*** | -4.839*** | -6.496*** | -2.581** |
|  | (0.495) | (0.881) | (1.108) | (1.235) |
| Dummy3 | 5.432*** | 4.074*** | 4.835*** | -5.399*** |
|  | (0.080) | (0.079) | (0.083) | (0.097) |
| Dummy6 | 6.464*** | 7.183*** | -1.524*** | -1.756*** |
|  | (0.075) | (0.094) | (0.084) | (0.084) |
| Dummy9 | 7.894*** | -1.286*** | -0.308*** | -1.697*** |
|  | (0.081) | (0.074) | (0.066) | (0.070) |
|  | 15.290*** | 26.691*** | 28.832*** | 32.617*** |
|  | (0.358) | (0.531) | (0.588) | (0.635) |
|  | 21.940*** | 34.203*** | 44.805*** | 39.466*** |
|  | (0.476) | (0.725) | (0.881) | (0.866) |
| (-1) | 1.346*** | 1.940*** | 1.824*** | 1.497*** |
|  | (0.051) | (0.089) | (0.112) | (0.125) |
| VIX_F | 0.122*** | 0.202*** | 0.278*** | 0.333*** |
|  | (0.003) | (0.005) | (0.007) | (0.007) |
| CHARGE_OFFS % | 71.865*** | 49.508*** | 38.116*** | 35.196*** |
|  | (0.174) | (0.282) | (0.331) | (0.357) |
|  | -0.143*** | -0.306*** | -0.352*** | -0.390*** |
|  | (0.008) | (0.014) | (0.018) | (0.020) |
| RANK_OP/1000 | -4.774*** | -15.44*** | -17.22*** | -30.29*** |
|  | (1.510) | (2.683) | (3.372) | (3.823) |
| RWA/T_ASSET | 0.027*** | 0.056*** | 0.083*** | 0.109*** |
|  | (0.002) | (0.003) | (0.004) | (0.005) |
| LOG_T_ASSET | 0.587*** | 0.834*** | 0.962*** | 0.659*** |
|  | (0.032) | (0.056) | (0.070) | (0.078) |
| Adjusted R-squared | 0.669 | 0.342 | 0.224 | 0.195 |
| Durbin-Watson stat | 1.959 | 1.160 | 0.882 | 0.776 |
| Obs | 242,424 | 245,267 | 245,048 | 244,461 |
| C(5)=c(6) Wald test | Pr = 0.000 | Pr = 0.000 | Pr = 0.000 | Pr = 0.000 |

The ***, **, and * represent significance at the 1%, 5%, and 10% probability levels respectively.

| **Table A14** Value of the coefficients of some determinants of future charge-offs with and without the VIX  The dependent variable is the percentage change of net charge-offs to loans h quarters ahead.  The VIX_M equals the average previous quarter value of the VIX; the VIX_F equals the value of the VIX on the last day of the previous quarter.  Coefficients and standard errors are multiplied by 100. | | | | | |
| --- | --- | --- | --- | --- | --- |
| CHARGE_OFFS% | h=1 | h=2 | h=3 | h=4 |  |
|  | 15.629*** | 27.713*** | 30.370*** | 34.485*** | Without VIX |
|  | 15.217*** | 26.371*** | 28.459*** | 32.251*** | With VIX_M |
|  | 15.290*** | 26.691*** | 28.832*** | 32.617*** | With VIX_F |
|  |  |  |  |  |  |
|  | 24.457*** | 37.553*** | 48.935*** | 44.632*** | Without VIX |
|  | 22.046*** | 33.858*** | 44.526*** | 39.218*** | With VIX_M |
|  | 21.940*** | 34.203*** | 44.805*** | 39.466*** | With VIX_F |
|  |  |  |  |  |  |
| (-1) | 1.162*** | 1.660*** | 1.398*** | 1.008*** | Without VIX |
|  | 1.335*** | 1.971*** | 1.849*** | 1.521*** | With VIX_M |
|  | 1.346*** | 1.940*** | 1.824*** | 1.497*** | With VIX_F |
|  |  |  |  |  |  |
|  | 0.105*** | 0.206*** | 0.269*** | 0.317*** | VIX_M |
|  | 0.122*** | 0.202*** | 0.278*** | 0.333*** | VIX_F |
|  |  |  |  |  |  |
| Adjusted R-squared | 0.662 | 0.336 | 0.215 | 0.184 | Without VIX |
|  | 0.668 | 0.343 | 0.224 | 0.194 | With VIX_M |
|  | 0.669 | 0.342 | 0.224 | 0.195 | With VIX_F |

The ***, **, and * represent significance at the 1%, 5%, and 10% probability levels respectively.

| **Table A15** Percentage change in the value of the coefficients of some determinants of future charge-offs when the VIX is a regressor  The dependent variable is the percentage change of net charge-offs to loans h quarters ahead.  The VIX_M equals the average previous quarter value of the VIX; the VIX_F equals the value of the VIX on the last day of the previous quarter. | | | | | |
| --- | --- | --- | --- | --- | --- |
| CHARGE_OFFS% | h | 1 | 2 | 3 | 4 |
|  | with VIX_M | -2.64 | -4.84 | -6.29 | -6.48 |
|  | with VIX_F | -2.17 | -3.69 | -5.06 | -5.42 |
|  |  |  |  |  |  |
|  | with VIX_M | -9.86 | -9.84 | -9.01 | -12.13 |
|  | with VIX_F | -10.29 | -8.92 | -8.44 | -11.57 |
|  |  |  |  |  |  |
| (-1) | with VIX_M | 14.89 | 18.73 | 32.26 | 50.89 |
|  | with VIX_F | 15.83 | 16.87 | 30.47 | 48.51 |
